# Supplementary material for: Distributional Weights in Benefit-Cost Analysis: Examples from Rwanda and Uganda
Source: publisher site journal article supplement (doi:10.1515/jafio-2021-0003), 2021-02-25
Supplement: Supplementary file 1 [file j_jafio-2021-0003_suppl.docx]

Table A Coffee production and prices in Rwanda

| Year | Total (tonnes) | Yield (hg/ha) | Exports (tonnes) | Export Value (1,000 USD) | Export Price (USD/ tonne) | Export Price (¢/pound) | ICA Columbian Milds | ICA Other Milds | Rwanda Farmer Price (FAO) | Rwanda Farmer Price (ICA) | Trade Price | Share Exported |
| --- | --- | --- | --- | --- | --- | --- | --- | --- | --- | --- | --- | --- |
| 1993 | 27,510 | 5,191 | 29,667 | 30,000 | 1,011.22 | 45.965 | 75.79 | 70.76 |  | 45.21 | 68.58 | 1.0784 |
| 1994 | 1,274 | 5,096 | 1,800 | 2,300 | 1,277.78 | 58.081 | 157.27 | 150.04 |  | 49.42 | 144.84 | 1.4129 |
| 1995 | 21,952 | 5,933 | 8,248 | 29,922 | 3,627.79 | 164.899 | 158.33 | 151.15 |  | 54.93 | 146.34 | 0.3757 |
| 1996 | 15,285 | 6,114 | 2,111 | 4,379 | 2,074.37 | 94.290 | 131.23 | 122.21 | 74.03 | 55.44 | 115.52 | 0.1381 |
| 1997 | 14,830 | 6,741 | 10,341 | 11,595 | 1,121.26 | 50.967 | 198.92 | 189.06 |  | 56.42 | 179.34 | 0.6973 |
| 1998 | 14,268 | 6,794 | 1,332 | 3,895 | 2,924.17 | 132.917 | 142.83 | 135.23 | 57.89 | 55.65 | 129.30 | 0.0920 |
| 1999 | 18,800 | 7,034 | 18,094 | 30,212 | 1,669.72 | 75.897 | 116.45 | 103.90 |  | 45.33 | 104.17 | 0.9609 |
| 2000 | 16,098 | 6,999 | 13,137 | 17,402 | 1,324.66 | 60.212 | 102.60 | 87.07 | 26.95 | 34.08 | 90.47 | 0.8149 |
| 2001 | 18,366 | 7,064 | 18,230 | 14,907 | 817.72 | 37.169 | 72.05 | 62.28 | 21.14 | 23.26 | 55.69 | 0.9407 |
| 2002 | 19,427 | 6,938 | 19,556 | 13,951 | 713.39 | 32.427 | 64.90 | 61.52 | 12.62 | 17.88 | 54.00 | 1.0055 |
| 2003 | 13,805 | 6,903 | 14,099 | 13,853 | 982.55 | 44.661 | 65.33 | 64.20 | 21.14 | 24.89 | 62.46 | 1.0213 |
| 2004 | 20,017 | 6,902 | 21,117 | 28,458 | 1,347.63 | 61.256 | 81.44 | 80.47 | 29.52 | 29.46 | 76.74 | 1.0446 |
| 2005 | 18,597 | 6,277 | 18,463 | 36,945 | 2,001.03 | 90.956 | 115.73 | 114.86 | 40.74 | 46.25 | 108.11 | 0.9928 |
| 2006 | 22,223 | 7,227 | 26,075 | 47,953 | 1,839.04 | 83.593 | 116.80 | 114.40 | 49.43 |  | 108.47 | 1.1695 |
| 2007 | 14,683 | 4,606 | 15,256 | 32,479 | 2,128.93 | 96.770 | 125.57 | 123.55 | 49.86 |  | 118.00 | 1.0235 |
| 2008 | 20,724 | 4,831 | 22,254 | 54,632 | 2,454.93 | 111.588 | 144.32 | 139.78 | 54.03 |  | 0.00 | 1.0231 |
| 2009 | 19,372 | 6,720 | 15,109 | 37,181 | 2,460.85 | 111.857 | 177.43 | 143.84 | 63.99 |  | 125.76 | 0.7798 |
| 2010 | 19,319 | 5,686 | 17,571 | 55,894 | 3,181.04 | 144.593 | 225.46 | 195.96 | 62.36 |  | 164.16 | 0.9092 |
| 2011 | 21,820 | 5,838 | 14,442 | 72,538 | 5,022.71 | 228.305 | 283.84 | 271.07 |  |  | 253.38 | 0.6530 |
| 2012 | 19,995 | 4,788 | 18,907 | 70,336 | 3,720.10 | 169.096 | 202.08 | 186.47 |  |  | 175.28 | 0.9336 |
| 2013 | 18,346 | 3,526 | 16,960 | 49,345 | 2,909.49 | 132.250 | 147.87 | 139.53 |  |  | 126.25 | 0.9240 |
| 2014 | 16,379 | 2,976 | 14,740 | 58,413 | 3,962.89 | 180.131 | 197.95 | 200.39 |  |  | 178.40 | 0.8966 |
| 2015 | 21,808 | 6,143 | 15,613 | 57,041 | 3,653.43 | 166.065 | 151.80 | 159.94 | 12.61 |  | 133.15 | 0.6632 |
| 2016 | 19,189 | 5,557 | 15,107 | 52,411 | 3,469.32 | 157.696 | 155.29 | 163.80 |  |  | 136.83 | 0.7451 |
| 2017 | 19,231 | 4,463 | 15,266 | 55,967 | 3,666.12 | 166.642 | 152.39 | 150.74 |  |  | 133.46 | 0.7775 |
| 2018 | 21,548 | 4,256 | 20,680 | 62,003 | 2,998.21 | 136.282 | 136.70 | 132.72 |  |  | 113.60 | 0.9218 |
| Avg. since 2009 | 19,701 | 4,995 | 16,440 | 57,113 | 3,504.42 | 159.292 | 183.08 | 174.45 |  |  | 119.32 | 0.8204 |
